# Supplementary material for: Genome-Wide Analysis of Immune Activation in Human T and B Cells Reveals Distinct Classes of Alternatively Spliced Genes
Source: PLoS One. 2009 Nov 19;4(11):e7906. doi: 10.1371/journal.pone.0007906 (PMC2775942; doi:10.1371/journal.pone.0007906)
Supplement: Table S7 — (0.05 MB XLS) [file pone.0007906.s009.xls]

## Sheet: Sheet0
© 2000-2009 Ingenuity Systems, Inc. All rights reserved.
Ingenuity Canonical Pathways	-Log(P-value)	Ratio	Molecules
Aminoacyl-tRNA Biosynthesis	8.2E00	1.45E-01	NARS, LARS, CARS, WARS, RARS, IARS2, DARS, AARS, SARS, MARS, IARS, EPRS
Purine Metabolism	5.97E00	4.77E-02	PKM2, NME1, ABCD3, ATP5A1, AK3, PSMC4, PAICS, CLPX, HSPD1, ATIC, GART, ATP5C1, IMPDH2, GMPS, MSH2, ATP5H (includes EG:10476), ATF7IP, ADK, ATP5J2, HPRT1, AK3L1
One Carbon Pool by Folate	5.7E00	1.54E-01	MTHFD2, DHFR, MTHFD1, ATIC, MTHFD1L, GART
Glycolysis/Gluconeogenesis	5.24E00	6.94E-02	PKM2, PGM2, GPI, HK2, ENO1, PGM1, ALDOA, PFKP, LDHA, LDHB
RAN Signaling	4.93E00	2.17E-01	KPNB1, CSE1L, KPNA2, XPO1, KPNA1
Glyoxylate and Dicarboxylate Metabolism	4.78E00	4.27E-02	MTHFD2, MDH1, MDH2, MTHFD1, MTHFD1L
Integrin Signaling	4.6E00	7.39E-02	ITGB1, FYN, PXN, ARPC1B, ARPC5L (includes EG:81873), CRKL, PIK3R1, ACTB, ACTG1, ARF1, ACTR3, CAPN1, ARPC3, ACTN4, FNBP1
Pentose Phosphate Pathway	4.59E00	6.67E-02	PGM2, GPI, PGD, PGM1, ALDOA, PFKP
Fcγ Receptor-mediated Phagocytosis in Macrophages and Monocytes	4.08E00	9.62E-02	FYN, PXN, ACTR3, ARPC1B, ARPC5L (includes EG:81873), PIK3R1, ACTB, ARPC3, FYB, ACTG1
Alanine and Aspartate Metabolism	4.05E00	6.82E-02	NARS, IL4I1, DARS, GOT1, AARS, ASNS
Glucocorticoid Receptor Signaling	3.87E00	5.36E-02	HSPA1A, TAF15, PIK3R1, HSPA9, STAT3, NFKB1, HSPA2, TSG101, HSPA4, MAPK14, HSP90AB1, ANXA1, FKBP4, HSP90AA1, A2M
FAK Signaling	3.57E00	8.16E-02	ITGB1, FYN, PXN, PIK3R1, ACTB, CAPN1, ACTG1, GIT2
Pyruvate Metabolism	3.57E00	4.7E-02	AKR7A2, PKM2, ME2, MDH1, MDH2, LDHA, LDHB
Glycine, Serine and Threonine Metabolism	3.57E00	4.67E-02	PSAT1, PDIA3, IL4I1, PHGDH, GOT1, CTH, SARS
Germ Cell-Sertoli Cell Junction Signaling	3.09E00	6.21E-02	ITGB1, PXN, MAPK14, PIK3R1, ACTB, ACTN4, IQGAP1, A2M, ACTG1, FNBP1
Clathrin-mediated Endocytosis Signaling	3.07E00	6.59E-02	ITGB1, CSNK2A2, ACTR3, ARPC1B, ARPC5L (includes EG:81873), PIK3R1, ACTB, CLTC, ARPC3, ACTG1, TSG101
Mechanisms of Viral Exit from Host Cells	3.02E00	1.14E-01	ACTB, XPO1, ACTG1, TSG101, LMNB1
EIF2 Signaling	2.91E00	7.29E-02	EIF2S3, EIF2S2, EIF4A3 (includes EG:9775), PIK3R1, EIF2C3, EIF4G1, EIF4E
Galactose Metabolism	2.87E00	4.31E-02	AKR7A2, PGM2, HK2, PGM1, PFKP
VEGF Signaling	2.84E00	7.22E-02	EIF2S3, EIF2S2, PXN, PIK3R1, ACTB, ACTN4, ACTG1
Oxidative Phosphorylation	2.75E00	5.42E-02	ATP5C1, NDUFB9, ATP5A1, ATP5H (includes EG:10476), ATP5J2, COX5A, CYC1, NDUFB4, NDUFA7
Fructose and Mannose Metabolism	2.73E00	3.4E-02	AKR7A2, PGM2, HK2, ALDOA, PFKP
Actin Cytoskeleton Signaling	2.6E00	5.49E-02	ITGB1, PXN, ARPC1B, ARPC5L (includes EG:81873), CRKL, PIK3R1, ACTB, IQGAP1, ACTG1, ACTR3, ARPC3, ACTN4, NCKAP1L
Huntington's Disease Signaling	2.55E00	4.66E-02	HSPA4, DYNC1I2, HSPA1A, GLS, PIK3R1, CAPN1, HDAC7, HSPA9, CLTC, HDAC1, HSPA2
Caveolar-mediated Endocytosis Signaling	2.54E00	8.54E-02	ITGB1, FYN, FLOT2, ACTB, FLOT1, COPB1, ACTG1
Arginine and Proline Metabolism	2.54E00	3.83E-02	P4HA1, P4HB, RARS, IL4I1, GOT1, LAP3, EPRS
Chronic Myeloid Leukemia Signaling	2.53E00	6.67E-02	PA2G4, CRKL, PIK3R1, HDAC7, HDAC1, NFKB2, NFKB1
IL-9 Signaling	2.48E00	1.08E-01	PIK3R1, STAT3, NFKB2, NFKB1
Phenylalanine, Tyrosine and Tryptophan Biosynthesis	2.42E00	4.48E-02	ENO1, IL4I1, GOT1
Glutamate Metabolism	2.33E00	5.13E-02	GMPS, GLS, GOT1, EPRS
RAR Activation	2.3E00	5.06E-02	CSNK2A2, PRMT1, MAPK14, RDH11, PIK3R1, NFKB2, NFKB1, CARM1, PARP1
Prostate Cancer Signaling	2.25E00	6.25E-02	PA2G4, HSP90AB1, PIK3R1, HSP90AA1, NFKB2, NFKB1
CD28 Signaling in T Helper Cells	2.18E00	6.4E-02	FYN, ACTR3, ARPC1B, ARPC5L (includes EG:81873), PIK3R1, ARPC3, NFKB2, NFKB1
Aryl Hydrocarbon Receptor Signaling	2.18E00	5.1E-02	HSP90AB1, FASN, HSP90AA1, ALDH18A1, DHFR, NFKB2, NFKB1, MCM7
ILK Signaling	2.16E00	4.84E-02	ITGB1, PXN, PIK3R1, ACTB, NFKB2, ACTN4, NFKB1, ACTG1, FNBP1
Cdc42 Signaling	2.16E00	6.06E-02	ITGB1, ACTR3, MAPK14, ARPC1B, ARPC5L (includes EG:81873), ARPC3, IQGAP1, CDC27
Virus Entry via Endocytic Pathways	2.13E00	6.25E-02	ITGB1, FYN, PIK3R1, ACTB, CLTC, ACTG1
IL-15 Signaling	2.11E00	7.46E-02	MAPK14, PIK3R1, STAT3, NFKB2, NFKB1
CD40 Signaling	2.08E00	7.25E-02	MAPK14, PIK3R1, STAT3, NFKB2, NFKB1
Inositol Metabolism	2.08E00	5.1E-02	RDH11, ME2, ALDOA, APEX1, NDUFA7
PI3K/AKT Signaling	2.08E00	5.15E-02	ITGB1, HSP90AB1, PIK3R1, HSP90AA1, NFKB2, NFKB1, EIF4E
IL-6 Signaling	2.03E00	6.32E-02	CSNK2A2, MAPK14, STAT3, NFKB2, NFKB1, A2M
Cysteine Metabolism	2E00	5.56E-02	CARS, GOT1, CTH, LDHA, LDHB
HMGB1 Signaling	1.99E00	6.12E-02	MAPK14, HAT1, PIK3R1, NFKB2, NFKB1, FNBP1
HIF1α Signaling	1.92E00	5.71E-02	MAPK14, PIK3R1, HSP90AA1, APEX1, LDHA, LDHB
Valine, Leucine and Isoleucine Biosynthesis	1.87E00	1.14E-01	LARS, BCAT2, IARS2, IARS, ILVBL
Acute Myeloid Leukemia Signaling	1.84E00	6.41E-02	PIK3R1, STAT3, NFKB2, NFKB1, TCF7
Mitochondrial Dysfunction	1.78E00	4.07E-02	ATP5C1, NDUFB9, ATP5A1, COX5A, CYC1, NDUFB4, NDUFA7
Citrate Cycle	1.78E00	5.08E-02	MDH1, MDH2, ACLY
Cleavage and Polyadenylation of Pre-mRNA	1.7E00	2.5E-01	CPSF2, CSTF1, NUDT21
fMLP Signaling in Neutrophils	1.69E00	5.51E-02	ACTR3, ARPC1B, ARPC5L (includes EG:81873), PIK3R1, ARPC3, NFKB2, NFKB1
Regulation of Actin-based Motility by Rho	1.66E00	6.45E-02	ACTR3, ARPC1B, ARPC5L (includes EG:81873), ACTB, ARPC3, FNBP1
Leukocyte Extravasation Signaling	1.64E00	4.1E-02	ITGB1, PXN, MAPK14, CRKL, PIK3R1, ACTB, ACTN4, ACTG1
Ephrin Receptor Signaling	1.64E00	4.52E-02	ITGB1, FYN, PXN, ACTR3, ARPC1B, ARPC5L (includes EG:81873), CRKL, ARPC3, STAT3
Mitotic Roles of Polo-Like Kinase	1.63E00	6.45E-02	HSP90AB1, HSP90AA1, CDC2, CDC27
Tight Junction Signaling	1.61E00	4.88E-02	CPSF2, CSTF1, NUDT21, ACTB, CSDA, NFKB2, NFKB1, ACTG1
TREM1 Signaling	1.6E00	5.8E-02	ITGB1, STAT3, NFKB2, NFKB1
ERK/MAPK Signaling	1.59E00	4.17E-02	ITGB1, FYN, PXN, PPP1R7, CRKL, PIK3R1, STAT3, EIF4E
Starch and Sucrose Metabolism	1.58E00	2.53E-02	PGM2, GPI, HK2, PGM1, SLC3A2
Apoptosis Signaling	1.56E00	5.38E-02	CAPN1, NFKB2, NFKB1, CDC2, PARP1
IL-10 Signaling	1.51E00	5.71E-02	MAPK14, STAT3, NFKB2, NFKB1
p53 Signaling	1.5E00	5.62E-02	PCNA, MAPK14, FASN, PIK3R1, HDAC1
Crosstalk between Dendritic Cells and Natural Killer Cells	1.5E00	5.1E-02	CAMK2D, ACTB, NFKB2, NFKB1, ACTG1
Neuregulin Signaling	1.48E00	5E-02	ITGB1, HSP90AB1, CRKL, PIK3R1, HSP90AA1
Ubiquinone Biosynthesis	1.48E00	3.36E-02	NDUFB9, MGMT, NDUFB4, NDUFA7
PTEN Signaling	1.45E00	4.76E-02	ITGB1, CSNK2A2, PIK3R1, NFKB2, NFKB1
Hypoxia Signaling in the Cardiovascular System	1.44E00	5.71E-02	P4HB, HSP90AB1, HSP90AA1, LDHA
Xenobiotic Metabolism Signaling	1.43E00	3.4E-02	MAPK14, CAMK2D, HSP90AB1, MGMT, PIK3R1, IL4I1, HSP90AA1, ALDH18A1, NFKB2, NFKB1
April Mediated Signaling	1.42E00	7.14E-02	MAPK14, NFKB2, NFKB1
Insulin Receptor Signaling	1.38E00	4.35E-02	FYN, PPP1R7, CRKL, PIK3R1, ACLY, EIF4E
B Cell Activating Factor Signaling	1.36E00	6.82E-02	MAPK14, NFKB2, NFKB1
Role of PKR in Interferon Induction and Antiviral Response	1.33E00	6.52E-02	MAPK14, NFKB2, NFKB1
FLT3 Signaling in Hematopoietic Progenitor Cells	1.31E00	5.48E-02	MAPK14, PIK3R1, STAT3, EIF4E
Small Cell Lung Cancer Signaling	1.31E00	4.65E-02	PA2G4, PIK3R1, NFKB2, NFKB1
Nitrogen Metabolism	1.3E00	2.24E-02	GLS, CTH, ASNS
Pantothenate and CoA Biosynthesis	1.3E00	4.69E-02	DPYD, BCAT2, ILVBL
Agrin Interactions at Neuromuscular Junction	1.28E00	5.56E-02	ITGB1, PXN, ACTB, ACTG1
Pancreatic Adenocarcinoma Signaling	1.27E00	4.31E-02	PA2G4, PIK3R1, STAT3, NFKB2, NFKB1
LPS-stimulated MAPK Signaling	1.26E00	5E-02	MAPK14, PIK3R1, NFKB2, NFKB1
Prolactin Signaling	1.26E00	5.13E-02	FYN, PIK3R1, STAT3, TCF7
PDGF Signaling	1.26E00	5.06E-02	CSNK2A2, CRKL, PIK3R1, STAT3
Lipid Antigen Presentation by CD1	1.26E00	9.09E-02	PDIA3, PSAP
PPARα/RXRα Activation	1.25E00	3.8E-02	MAPK14, HSP90AB1, PDIA3, FASN, HSP90AA1, NFKB2, NFKB1
Type I Diabetes Mellitus Signaling	1.24E00	4.39E-02	MAPK14, NFKB2, HSPD1, NFKB1, GZMB
NF-κB Activation by Viruses	1.24E00	4.94E-02	ITGB1, PIK3R1, NFKB2, NFKB1
Nitric Oxide Signaling in the Cardiovascular System	1.24E00	4.35E-02	HSP90AB1, PIK3R1, HSP90AA1, ATP2A2
Reelin Signaling in Neurons	1.22E00	5.19E-02	ITGB1, FYN, CRKL, PIK3R1
DNA Methylation and Transcriptional Repression Signaling	1.22E00	8.7E-02	CHD3, HDAC1
Renin-Angiotensin Signaling	1.21E00	4.17E-02	MAPK14, PIK3R1, STAT3, NFKB2, NFKB1
NRF2-mediated Oxidative Stress Response	1.21E00	3.78E-02	AKR7A2, MAPK14, PIK3R1, ACTB, CCT7, DNAJA1, ACTG1
EGF Signaling	1.18E00	5.77E-02	CSNK2A2, PIK3R1, STAT3
Selenoamino Acid Metabolism	1.14E00	3.9E-02	MGMT, CTH, MARS
Toll-like Receptor Signaling	1.14E00	5.56E-02	MAPK14, NFKB2, NFKB1
Type II Diabetes Mellitus Signaling	1.13E00	3.16E-02	PKM2, PIK3R1, ACSL4, NFKB2, NFKB1
Thrombin Signaling	1.11E00	3.43E-02	MAPK14, CAMK2D, PDIA3, PIK3R1, NFKB2, NFKB1, FNBP1
D-glutamine and D-glutamate Metabolism	1.11E00	3.7E-02	GLS
Role of Pattern Recognition Receptors in Recognition of Bacteria and Viruses	1.1E00	4.49E-02	IRF4, PIK3R1, NFKB2, NFKB1
FGF Signaling	1.1E00	4.55E-02	MAPK14, CRKL, PIK3R1, STAT3
Amyloid Processing	1.1E00	5.36E-02	CSNK2A2, MAPK14, CAPN1
Colorectal Cancer Metastasis Signaling	1.09E00	3.24E-02	MSH2, PIK3R1, MSH6, STAT3, NFKB2, NFKB1, FNBP1, TCF7
Production of Nitric Oxide and Reactive Oxygen Species in Macrophages	1.07E00	3.23E-02	MAPK14, PPP1R7, PIK3R1, NFKB2, NFKB1, FNBP1
TR/RXR Activation	1.06E00	4.26E-02	ENO1, FASN, PIK3R1, PFKP
Lymphotoxin β Receptor Signaling	1.02E00	4.92E-02	PIK3R1, NFKB2, NFKB1
Semaphorin Signaling in Neurons	1.02E00	5.45E-02	ITGB1, FYN, FNBP1
IL-22 Signaling	1.02E00	7.41E-02	MAPK14, STAT3
Methionine Metabolism	1.02E00	3.75E-02	IL4I1, CTH, MARS
IL-15 Production	9.88E-01	6.45E-02	NFKB2, NFKB1
Cell Cycle: G1/S Checkpoint Regulation	9.84E-01	5.08E-02	PA2G4, HDAC7, HDAC1
PPAR Signaling	9.75E-01	3.96E-02	HSP90AB1, HSP90AA1, NFKB2, NFKB1
AMPK Signaling	9.72E-01	3.68E-02	MAPK14, FASN, PIK3R1, AK3, AK3L1, PFKP
Primary Immunodeficiency Signaling	9.66E-01	4.76E-02	FYN, STAT3, TCF7
G-Protein Coupled Receptor Signaling	9.53E-01	3.21E-02	FYN, CAMK2D, PIK3R1, RGS10, STAT3, NFKB2, NFKB1
Urea Cycle and Metabolism of Amino Groups	9.36E-01	2.5E-02	DARS, ALDH18A1
Acute Phase Response Signaling	9.19E-01	3.39E-02	MAPK14, PIK3R1, STAT3, NFKB2, NFKB1, A2M
Tyrosine Metabolism	9.17E-01	1.49E-02	MGMT, IL4I1, GOT1
4-1BB Signaling in T Lymphocytes	8.89E-01	5.56E-02	NFKB2, NFKB1
Angiopoietin Signaling	8.86E-01	4.23E-02	PIK3R1, NFKB2, NFKB1
GM-CSF Signaling	8.86E-01	4.48E-02	CAMK2D, PIK3R1, STAT3
Pyrimidine Metabolism	8.78E-01	2.59E-02	DUT (includes EG:1854), NME1, DPYD, AK3, AK3L1, CTPS
mTOR Signaling	8.68E-01	3.21E-02	EIF4A3 (includes EG:9775), PIK3R1, EIF4G1, FNBP1, EIF4E
HGF Signaling	8.64E-01	3.85E-02	PXN, CRKL, PIK3R1, STAT3
T Cell Receptor Signaling	8.64E-01	3.64E-02	FYN, PIK3R1, NFKB2, NFKB1
Macropinocytosis Signaling	8.56E-01	4.17E-02	ITGB1, PIK3R1, ACTN4
iCOS-iCOSL Signaling in T Helper Cells	8.52E-01	3.48E-02	CAMK2D, PIK3R1, NFKB2, NFKB1
Role of CHK Proteins in Cell Cycle Checkpoint Control	8.44E-01	5.88E-02	PCNA, CDC2
Erythropoietin Signaling	8.42E-01	3.95E-02	PIK3R1, NFKB2, NFKB1
Growth Hormone Signaling	8.28E-01	4.11E-02	PIK3R1, STAT3, A2M
NF-κB Signaling	8.21E-01	3.36E-02	CSNK2A2, PIK3R1, HDAC1, NFKB2, NFKB1
Valine, Leucine and Isoleucine Degradation	8.14E-01	2.7E-02	BCAT2, IL4I1, HMGCS1
Phenylalanine Metabolism	8.04E-01	1.83E-02	IL4I1, GOT1
LXR/RXR Activation	8E-01	3.49E-02	FASN, NFKB2, NFKB1
B Cell Receptor Signaling	7.94E-01	3.23E-02	MAPK14, CAMK2D, PIK3R1, NFKB2, NFKB1
IL-3 Signaling	7.74E-01	4.11E-02	CRKL, PIK3R1, STAT3
IL-12 Signaling and Production in Macrophages	7.67E-01	3.03E-02	MAPK14, PIK3R1, NFKB2, NFKB1
IL-17 Signaling	7.61E-01	4.11E-02	MAPK14, PIK3R1, NFKB1
MIF Regulation of Innate Immunity	7.3E-01	4.17E-02	NFKB2, NFKB1
Cell Cycle: G2/M DNA Damage Checkpoint Regulation	7.3E-01	4.65E-02	TOP2A, CDC2
Gα12/13 Signaling	7.28E-01	3.25E-02	PXN, PIK3R1, NFKB2, NFKB1
Ceramide Signaling	7.25E-01	3.57E-02	PIK3R1, NFKB2, NFKB1
BMP signaling pathway	7.25E-01	3.75E-02	MAPK14, NFKB2, NFKB1
LPS/IL-1 Mediated Inhibition of RXR Function	7.13E-01	2.93E-02	MGMT, IL4I1, ACSL4, XPO1, ALDH18A1, HMGCS1
Androgen Signaling	7.09E-01	2.76E-02	HSPA4, HSP90AA1, NFKB2, NFKB1
Aldosterone Signaling in Epithelial Cells	6.69E-01	3.06E-02	PDIA3, PIK3R1, HSP90AA1
Histidine Metabolism	6.66E-01	1.67E-02	MGMT, IL4I1
Fatty Acid Biosynthesis	6.63E-01	1.96E-02	FASN
Synthesis and Degradation of Ketone Bodies	6.63E-01	5.26E-02	HMGCS1
Role of RIG1-like Receptors in Antiviral Innate Immunity	6.52E-01	3.92E-02	NFKB2, NFKB1
Molecular Mechanisms of Cancer	6.38E-01	2.42E-02	FYN, MAPK14, CAMK2D, PA2G4, HAT1, PIK3R1, NFKB2, NFKB1, FNBP1
CTLA4 Signaling in Cytotoxic T Lymphocytes	6.28E-01	3.3E-02	FYN, PIK3R1, CLTC
GNRH Signaling	6.24E-01	2.8E-02	MAPK14, CAMK2D, NFKB2, NFKB1
Role of NFAT in Regulation of the Immune Response	6.23E-01	2.58E-02	FYN, PIK3R1, XPO1, NFKB2, NFKB1
Pentose and Glucuronate Interconversions	6.1E-01	1.32E-02	AKR7A2, PDIA6
Folate Biosynthesis	6.04E-01	1.25E-02	DHFR
Cellular Effects of Sildenafil (Viagra)	6E-01	2.65E-02	PABPC4, PDIA3, ACTB, ACTG1
CNTF Signaling	5.97E-01	3.64E-02	PIK3R1, STAT3
IGF-1 Signaling	5.8E-01	3.06E-02	CSNK2A2, PXN, PIK3R1
Methane Metabolism	5.79E-01	1.52E-02	PDIA6
Role of BRCA1 in DNA Damage Response	5.72E-01	3.77E-02	MSH2, MSH6
CDK5 Signaling	5.71E-01	3.19E-02	ITGB1, PPP1R7, CAPN1
CD27 Signaling in Lymphocytes	5.6E-01	3.51E-02	NFKB2, NFKB1
IL-2 Signaling	5.37E-01	3.45E-02	CSNK2A2, PIK3R1
Axonal Guidance Signaling	5.36E-01	2.47E-02	ITGB1, FYN, PXN, ACTR3, ARPC1B, ARPC5L (includes EG:81873), CRKL, PIK3R1, ARPC3, EIF4E
Parkinson's Signaling	5.33E-01	5.88E-02	MAPK14
Thrombopoietin Signaling	5.26E-01	3.23E-02	PIK3R1, STAT3
Glioma Signaling	5.21E-01	2.68E-02	CAMK2D, PA2G4, PIK3R1
Fc Epsilon RI Signaling	5.13E-01	2.86E-02	FYN, MAPK14, PIK3R1
Neuropathic Pain Signaling In Dorsal Horn Neurons	4.98E-01	2.88E-02	CAMK2D, PDIA3, PIK3R1
Cholecystokinin/Gastrin-mediated Signaling	4.98E-01	2.88E-02	PXN, MAPK14, FNBP1
Calcium-induced T Lymphocyte Apoptosis	4.84E-01	3.08E-02	HDAC1, ATP2A2
Death Receptor Signaling	4.84E-01	3.12E-02	NFKB2, NFKB1
Sphingosine-1-phosphate Signaling	4.75E-01	2.65E-02	PDIA3, PIK3R1, FNBP1
Sulfur Metabolism	4.74E-01	1.64E-02	CTH
Induction of Apoptosis by HIV1	4.74E-01	3.08E-02	NFKB2, NFKB1
Propanoate Metabolism	4.74E-01	1.54E-02	LDHA, LDHB
Aminophosphonate Metabolism	4.57E-01	1.54E-02	MGMT
JAK/Stat Signaling	4.56E-01	3.12E-02	PIK3R1, STAT3
N-Glycan Degradation	4.41E-01	3.12E-02	NEU1
Activation of IRF by Cytosolic Pattern Recognition Receptors	4.38E-01	2.74E-02	NFKB2, NFKB1
Dendritic Cell Maturation	4.33E-01	2.31E-02	MAPK14, PIK3R1, NFKB2, NFKB1
IL-4 Signaling	4.29E-01	2.78E-02	IRF4, PIK3R1
Non-Small Cell Lung Cancer Signaling	4.21E-01	2.53E-02	PA2G4, PIK3R1
Cytotoxic T Lymphocyte-mediated Apoptosis of Target Cells	3.85E-01	3.23E-02	GZMB
Biosynthesis of Steroids	3.85E-01	7.81E-03	FDPS
IL-8 Signaling	3.73E-01	2.14E-02	PIK3R1, NFKB1, FNBP1, CSTB
Melatonin Signaling	3.68E-01	2.56E-02	CAMK2D, PDIA3
Sonic Hedgehog Signaling	3.61E-01	3.23E-02	CDC2
Chemokine Signaling	3.61E-01	2.6E-02	MAPK14, CAMK2D
Dopamine Receptor Signaling	3.61E-01	2.2E-02	PPP1R7, IL4I1
Calcium Signaling	3.46E-01	1.94E-02	CAMK2D, HDAC7, HDAC1, ATP2A2
Cardiac Hypertrophy Signaling	3.38E-01	2.06E-02	MAPK14, PDIA3, PIK3R1, FNBP1, EIF4E
Relaxin Signaling	3.38E-01	2.03E-02	PIK3R1, NFKB2, NFKB1
Hepatic Fibrosis / Hepatic Stellate Cell Activation	3.33E-01	2.22E-02	NFKB2, NFKB1, A2M
Serotonin Receptor Signaling	3.19E-01	2.17E-02	IL4I1
Inositol Phosphate Metabolism	3.18E-01	1.7E-02	PDIA3, PIK3R1, CDC2
Factors Promoting Cardiogenesis in Vertebrates	3.16E-01	2.25E-02	MAPK14, TCF7
Retinoic acid Mediated Apoptosis Signaling	3.09E-01	2.27E-02	PARP1
Tryptophan Metabolism	3.05E-01	1.18E-02	WARS, MGMT, IL4I1
Cell Cycle Regulation by BTG Family Proteins	3E-01	2.78E-02	PRMT1
Coagulation System	2.92E-01	2.7E-02	A2M
Docosahexaenoic Acid (DHA) Signaling	2.92E-01	2.22E-02	PIK3R1
Oncostatin M Signaling	2.75E-01	2.63E-02	STAT3
Amyotrophic Lateral Sclerosis Signaling	2.73E-01	1.79E-02	PIK3R1, CAPN1
FcγRIIB Signaling in B Lymphocytes	2.67E-01	1.79E-02	PIK3R1
Thyroid Cancer Signaling	2.67E-01	2.22E-02	TCF7
Lysine Degradation	2.67E-01	1.71E-02	LTA4H, CLPX, LAP3, GZMB
SAPK/JNK Signaling	2.63E-01	2.04E-02	CRKL, PIK3R1
Nicotinate and Nicotinamide Metabolism	2.53E-01	1.47E-02	NAMPT, CDC2
Allograft Rejection Signaling	2.53E-01	2.22E-02	GZMB
Graft-versus-Host Disease Signaling	2.46E-01	2.22E-02	GZMB
Melanoma Signaling	2.39E-01	2.17E-02	PIK3R1
Autoimmune Thyroid Disease Signaling	2.39E-01	2.13E-02	GZMB
Retinol Metabolism	2.39E-01	1.54E-02	RDH11
CXCR4 Signaling	2.38E-01	1.79E-02	PXN, PIK3R1, FNBP1
Role of Oct4 in Mammalian Embryonic Stem Cell Pluripotency	2.21E-01	2.22E-02	PARP1
Polyamine Regulation in Colon Cancer	2.04E-01	1.75E-02	PSMC4
